# Supplementary material for: Chasing the storm: Recruiting non‐hospitalized patients for a multi‐site randomized controlled trial in the United States during the COVID‐19 pandemic
Source: PubMed Central journal article supplement — Clin Transl Sci. 2021 Dec 24;15(4):831–7. doi: 10.1111/cts.13211 (PMC9010275; doi:10.1111/cts.13211), 2021-12-24
Supplement: CTS-15-831-s001.pdf [file CTS-15-831-s001.pdf]

## Supplement 2. ColCorona-US Telephone Script

Hello, may I speak with **[potential participant name]**,

My name is **[name of coordinator]**. I am a research coordinator from **[site name]**. We are hoping that you may be willing to help us evaluate a treatment that may prevent COVID-19 from progressing into the more severe form of the disease that require hospitalization, ventilator use, or lead to death. Your doctor and the information in your medical record indicates that you may have recently tested positive for COVID-19, or have experienced symptoms of COVID-19, and that you may be willing and eligible to participate in a very important COVID-19 research study that we are conducting. The study is called COLCORONA and is being run with the Montreal Heart Institute in Canada. It is a short, simple study for people 40 years or older who have been diagnosed for COVID in the last day or two. There are no clinic visits and is completed entirely from your home. There is no cost for participating in this study. You will be paid for your participation in this study and will receive payment after you complete your day 15 phone call.

Would you help us and our community so we can test this treatment?

Participation is completely voluntary. You do not have to participate. Your decision will not affect your relationship with your medical provider or **[site name]**.

We know some people with COVID-19 will get very sick. This is partly due to the body's very strong inflammatory response to the virus. We believe colchicine may be effective in COVID since it is a generally well-tolerated medicine that is regularly used to treat other inflammatory conditions, such as gout. We want to find out if given early in the course of COVID-19, colchicine can prevent hospitalizations, lung complications, and COVID-related death.

To participate, you do not have to leave your home. Study visits are done by phone and the study medication will be delivered to your home by a special courier. A pill is taken once or twice a day for 30 days. The study nurse will contact you twice during the 30 days to ask about how you are doing. You can contact a medical professional anytime day or night with any questions or concerns using a toll-free hotline.

This is a randomized medication trial. One group will receive colchicine, which is the drug I just mentioned. The other group will receive a placebo that does not have any colchicine. You will not know which group you have been assigned to. Being randomized gives you an equal possibility of being assigned to any group. This makes the groups similar as possible, making it easier to see differences, such as one treatment is better than the other.

To participate you will have to call or I can merge this call with the study's main toll-free hotline and the nurse on the line will enroll you in the study.

The Canadian team that manages this hotline and the **[site name]** team communicate with each other regularly.

Do you have any questions so far?

Would you like to participate in the study?

If you are not sure, would you like some time to think about it, or discuss with friends, family, or doctor (who is your doctor and what is the contact information for our team to send the information to)? If so, I could call you back in an hour or two.

***If not interested:*** Thank you for your time, and if at any point you change your mind you can reach me at [study team contact information or hotline information]. Have a great day!

***If interested:*** Great! The phone number to the toll-free hotline is: 1-877-536-6837. **[If not merging call]** Please call as soon as possible and say that you were pre-screened by **[site name]** and please tell them that you spoke with me, **[name of coordinator]**. The hotline call center is open 24/7 and the medical staff speaks English and Spanish.

Thank you for your time!

***If participant is upset:*** We understand this may be a difficult time for you. We'll update our database to indicate you are not interested so you shouldn't be receiving any further calls from our team. Thank you for your time. Have a great rest of your day.

***If participant does not have adequate medical records to confirm eligibility:*** While reviewing your records, we noticed that there are no lab values available in our records within the past year, which is one of the requirements for the study. Is this something you can find out before we refer you to the hotline?
