# Supplementary material for: Chasing the storm: Recruiting non‐hospitalized patients for a multi‐site randomized controlled trial in the United States during the COVID‐19 pandemic
Source: PubMed Central journal article supplement — Clin Transl Sci. 2021 Dec 24;15(4):831–7. doi: 10.1111/cts.13211 (PMC9010275; doi:10.1111/cts.13211), 2021-12-24
Supplement: CTS-15-831-s003.pdf [file CTS-15-831-s003.pdf]

### **Supplement 3. ColCorona-US Email Template**

Dear **[potential participant name]**,

My name is **[name of coordinator]**, and I am a research coordinator from **[site name]**. We are hoping that you would be willing to help us evaluate a treatment to prevent COVID-19 from progressing into the more severe forms of the disease that require hospitalization, ventilator use, or lead to death. Your doctor and the information in your medical record indicate that you may have recently tested positive for COVID-19, or experienced symptoms of COVID-19, and that you may be eligible to participate in the very important COVID-19 research study we are conducting. The study is called COLCORONA and is being run along with the Montreal Heart Institute in Canada.

This is a short, simple study for people 40 years or older who have been diagnosed with suspected or confirmed COVID-19 in the last day or two. There are no clinic visits and is completed entirely from your home. There is no cost for participating in this study. You will be paid for your participation in this study and will receive payment after you complete your day 15 phone call.

We know that some people with COVID-19 will get very sick. This is partly due to the body's overly strong inflammatory response to the virus. We believe colchicine may be effective in COVID since it is a generally well-tolerated medicine that is regularly used to treat other inflammatory conditions, such as gout. We want to find out if, when given early in the course of COVID-19, colchicine can prevent hospitalizations, lung complications, and COVID-related death.

This is a randomized medication trial. One group will receive colchicine, which is the drug I described above. The other group will receive an identical-looking pill that has no colchicine. You will not know which group you have been assigned to. This makes the groups as similar as possible, making it easier to see differences, including whether colchicine works for COVID 19.

If you would like to participate or have any questions, please contact us at [study team contact information or hotline information] or reply to this email as soon as possible.

You must call within 2 days of being diagnosed with COVID-19 to be eligible for this study since the goal of the study is to determine if we can prevent progression to severe complications of COVID-19.

Thank you and have a great day,

**[name of coordinator]**  
COLCORONA Study Team
