# Supplementary material for: Chasing the storm: Recruiting non‐hospitalized patients for a multi‐site randomized controlled trial in the United States during the COVID‐19 pandemic
Source: PubMed Central journal article supplement — Clin Transl Sci. 2021 Dec 24;15(4):831–7. doi: 10.1111/cts.13211 (PMC9010275; doi:10.1111/cts.13211), 2021-12-24
Supplement: CTS-15-831-s004.pdf [file CTS-15-831-s004.pdf]

**Supplement 1.** Instructions given to courier for no-contact drug delivery

- Shipment is made to a recipient who has tested positive for COVID-19 and all precautions are to be taken. Do not touch the door, doorbell, or any surfaces outside the house. Wear protective gloves if needed and avoid touching your face while in proximity.
- Upon arrival at recipient's home, keep your distance and simply drop the package outside the door.
- Call the recipient and have them pick up package at the door.
- Wait to see recipient pick up package before leaving.
