# Supplementary material for: Chasing the storm: Recruiting non‐hospitalized patients for a multi‐site randomized controlled trial in the United States during the COVID‐19 pandemic
Source: PubMed Central journal article supplement — Clin Transl Sci. 2021 Dec 24;15(4):831–7. doi: 10.1111/cts.13211 (PMC9010275; doi:10.1111/cts.13211), 2021-12-24
Supplement: CTS-15-831-s005.pdf [file CTS-15-831-s005.pdf]

**Supplement 4. ColCorona-US Text Script**

Hello **[potential participant name]**,

I am contacting you from **[site name]** to see if you are willing to help us evaluate a treatment that may prevent COVID-19 from progressing into the more severe forms of the disease that require hospitalization, ventilator use, or lead to death. Would you have time to talk today to learn more? Let us know a good time to call you. We have sent you information to the email you have listed in your chart in case you are interested in learning more. You will be paid for your participation in this study and will receive payment after you complete your day 15 phone call.

You must call within 2 days of being diagnosed with COVID-19 to be eligible for this study since the goal of the study is to determine if we can prevent progression to severe complications of COVID-19.

Thank you,

**[name of coordinator]**

COLCORONA Study Team

**[follow with picture of flier]**
